# Supplementary material for: Rocatinlimab Improves Patient-Reported Outcomes in Adults with Moderate-to-Severe Atopic Dermatitis: Results from a Double-Blind Placebo-Controlled Phase 2b Study
Source: PubMed Central journal article supplement — Dermatol Ther (Heidelb). 2024 Nov 12;14(12):3351–66. doi: 10.1007/s13555-024-01303-z (PMC11604902; doi:10.1007/s13555-024-01303-z), 2024-11-12
Supplement: 13555_2024_1303_MOESM1_ESM.pdf [file 13555_2024_1303_MOESM1_ESM.pdf]

## Supplementary materials

### **Rocatinlimab improves patient-reported outcomes in adults with moderate-to-severe atopic dermatitis: results from a double-blind placebo-controlled phase 2b study**

Melinda Gooderham,<sup>a</sup> Emma Guttman-Yassky,<sup>b</sup> Ken Igawa,<sup>c</sup> Kenji Kabashima,<sup>d</sup> Ehsanollah Esfandiari,<sup>e</sup> Angela J Rylands,<sup>e</sup> Angela Williams,<sup>e</sup> Annabel Nixon,<sup>f</sup> Jennifer E Dent,<sup>f</sup> Eric Simpson<sup>g</sup>

<sup>a</sup>SKiN Centre for Dermatology, Queen's University and Probity Medical Research, Peterborough, Ontario, Canada

<sup>b</sup>Icahn School of Medicine at Mount Sinai, USA

<sup>c</sup>Dokkyo Medical University, Mibu, Japan

<sup>d</sup>Kyoto University, Japan

<sup>e</sup>Kyowa Kirin International, UK

<sup>f</sup>Chilli Consultancy, Salisbury, UK

<sup>g</sup>Oregon Health and Science University, USA

#### **Corresponding author**

Melinda Gooderham

SKiN Centre for Dermatology

775 Monaghan Road

Peterborough

Ontario

Canada

Email: [mgooderham@centrefordermatology.com](mailto:mgooderham@centrefordermatology.com)

**Supplementary Table 1 PRO scores at baseline (n=267)**

| PRO                                                                                                                                                                                                                                                                  |                        | Possible range | Mean $\pm$ SD (range) | Median (Q1, Q3) |
|----------------------------------------------------------------------------------------------------------------------------------------------------------------------------------------------------------------------------------------------------------------------|------------------------|----------------|-----------------------|-----------------|
| Pruritus NRS                                                                                                                                                                                                                                                         |                        | 0–10           | 7.5 $\pm$ 1.9 (1–10)  | 8 (7, 9)        |
| Sleep Disturbance NRS                                                                                                                                                                                                                                                |                        | 0–10           | 5.5 $\pm$ 2.9 (0–10)  | 6 (3, 8)        |
| DLQI                                                                                                                                                                                                                                                                 | Total score            | 0–30           | 12.6 $\pm$ 7.1 (0–30) | 11 (7, 18)      |
|                                                                                                                                                                                                                                                                      | Symptoms and feelings  | 0–6            | 4.0 $\pm$ 1.4 (0–6)   | 4 (3, 5)        |
|                                                                                                                                                                                                                                                                      | Daily activities       | 0–6            | 2.8 $\pm$ 1.7 (0–6)   | 3 (1, 4)        |
|                                                                                                                                                                                                                                                                      | Leisure                | 0–6            | 2.1 $\pm$ 1.9 (0–6)   | 2 (0, 3)        |
|                                                                                                                                                                                                                                                                      | Work and school        | 0–3            | 1.3 $\pm$ 1.1 (0–3)   | 1 (0, 2)        |
|                                                                                                                                                                                                                                                                      | Personal relationships | 0–6            | 1.2 $\pm$ 1.6 (0–6)   | 1 (0, 2)        |
|                                                                                                                                                                                                                                                                      | Treatment              | 0–3            | 1.2 $\pm$ 1.0 (0–3)   | 1 (0, 2)        |
| Higher NRS scores indicate greater severity of pruritus/sleep loss.<br>Higher DLQI scores indicate greater HRQL impairment.<br>DLQI, Dermatitis Life Quality Index; NRS, Numerical Rating Scale; PRO, patient-reported outcome; Q, quartile; SD, standard deviation. |                        |                |                       |                 |

**Supplementary Table 2 Variation in DLQI scores by demographic characteristics at baseline (n=267)**

| Subject characteristic    | n   | Domain scores         |                   |                     |                   |                     |                   |                     |                   |                        |                   |                     |                   | Total score          |                   |
|---------------------------|-----|-----------------------|-------------------|---------------------|-------------------|---------------------|-------------------|---------------------|-------------------|------------------------|-------------------|---------------------|-------------------|----------------------|-------------------|
|                           |     | Symptoms and feelings |                   | Daily activities    |                   | Leisure             |                   | Work and school     |                   | Personal relationships |                   | Treatment           |                   |                      |                   |
|                           |     | Mean (SD)             | Corr <sup>a</sup> | Mean (SD)           | Corr <sup>a</sup> | Mean (SD)           | Corr <sup>a</sup> | Mean (SD)           | Corr <sup>a</sup> | Mean (SD)              | Corr <sup>a</sup> | Mean (SD)           | Corr <sup>a</sup> | Mean (SD)            | Corr <sup>a</sup> |
| Age (years)               | 267 | na                    | 0.09              | na                  | 0.09              | na                  | -0.01             | na                  | <b>-0.13</b>      | na                     | 0.12              | na                  | 0.03              | na                   | 0.03              |
| Sex                       |     |                       |                   |                     |                   |                     |                   |                     |                   |                        |                   |                     |                   |                      |                   |
| Female                    | 109 | <b>4.4</b><br>(1.4)   | na                | <b>3.2</b><br>(1.8) | na                | <b>2.6</b><br>(2.1) | na                | 1.3<br>(1.2)        | na                | <b>1.6</b><br>(1.8)    | na                | 1.3<br>(1.0)        | na                | <b>14.9</b><br>(7.7) | na                |
| Male                      | 158 | <b>3.8</b><br>(1.4)   | na                | <b>2.5</b><br>(1.7) | na                | <b>1.8</b><br>(1.8) | na                | 1.2<br>(1.1)        | na                | <b>0.9</b><br>(1.4)    | na                | 1.1<br>(0.9)        | na                | <b>11.3</b><br>(6.5) | na                |
| Country                   |     |                       |                   |                     |                   |                     |                   |                     |                   |                        |                   |                     |                   |                      |                   |
| Canada                    | 25  | <b>4.1</b><br>(1.6)   | na                | <b>3.0</b><br>(1.9) | na                | <b>2.0</b><br>(1.8) | na                | <b>0.8</b><br>(1.1) | na                | <b>1.7</b><br>(1.8)    | na                | <b>1.3</b><br>(1.0) | na                | <b>13.3</b><br>(7.9) | na                |
| Germany                   | 33  | <b>4.6</b><br>(1.2)   | na                | <b>3.5</b><br>(1.5) | na                | <b>3.7</b><br>(2.0) | na                | <b>1.3</b><br>(1.2) | na                | <b>2.8</b><br>(1.8)    | na                | <b>1.4</b><br>(1.1) | na                | <b>18.8</b><br>(7.2) | na                |
| Japan                     | 155 | <b>3.8</b><br>(1.4)   | na                | <b>2.2</b><br>(1.6) | na                | <b>1.5</b><br>(1.5) | na                | <b>1.2</b><br>(1.1) | na                | <b>0.5</b><br>(0.9)    | na                | <b>1.0</b><br>(0.9) | na                | <b>10.3</b><br>(6.0) | na                |
| USA                       | 54  | <b>4.4</b><br>(1.5)   | na                | <b>3.6</b><br>(1.7) | na                | <b>3.1</b><br>(2.1) | na                | <b>1.7</b><br>(1.2) | na                | <b>1.8</b><br>(1.8)    | na                | <b>1.6</b><br>(0.9) | na                | <b>16.7</b><br>(6.7) | na                |
| Race                      |     |                       |                   |                     |                   |                     |                   |                     |                   |                        |                   |                     |                   |                      |                   |
| Asian                     | 171 | <b>3.8</b><br>(1.4)   | na                | <b>2.3</b><br>(1.7) | na                | <b>1.6</b><br>(1.7) | na                | 1.3<br>(1.1)        | na                | <b>0.7</b><br>(1.2)    | na                | <b>1.1</b><br>(1.0) | na                | <b>10.9</b><br>(6.4) | na                |
| Black or African American | 13  | <b>4.5</b><br>(1.7)   | na                | <b>3.5</b><br>(2.0) | na                | <b>2.9</b><br>(2.3) | na                | 1.6<br>(1.3)        | na                | <b>2.0</b><br>(1.9)    | na                | <b>1.2</b><br>(1.1) | na                | <b>16.7</b><br>(8.2) | na                |
| White                     | 82  | <b>4.5</b><br>(1.3)   | na                | <b>3.5</b><br>(1.6) | na                | <b>3.0</b><br>(2.0) | na                | 1.3<br>(1.2)        | na                | <b>2.1</b><br>(1.8)    | na                | <b>1.5</b><br>(0.9) | na                | <b>16.7</b><br>(7.0) | na                |
| BMI (kg/m <sup>2</sup> )  | 266 | na                    | 0.09              | na                  | 0.04              | na                  | 0.03              | na                  | -0.10             | na                     | 0.06              | na                  | -0.01             | na                   | -0.01             |

Spearman's rank coefficients are reported for correlations between continuous/ordinal demographic/clinical variables and DLQI scores. Mean DLQI scores for categorical variables were compared using Mann-Whitney tests (two categories) or ANOVA F-test (multiple categories); significant results (p<0.05) shown in **bold**.

<sup>a</sup>Interpretation of Spearman's rank correlation coefficient (for ordinal and continuous variables): 0.90–1.00, very high positive; 0.70–0.90, high positive; 0.50–0.70, moderate positive; 0.30–0.50, low positive; 0.00–0.30, negligible [36].

BMI; body mass index; corr, correlation; DLQI, Dermatology Life Quality Index; na, not applicable; SD, standard deviation.

**Supplementary Table 3 Variation in DLQI scores by clinical characteristics at baseline (n=267)**

| Subject characteristic | N   | Domain scores         |                   |                     |                   |                     |                   |                     |                   |                        |                   |                     |                   | Total score          |                   |  |
|------------------------|-----|-----------------------|-------------------|---------------------|-------------------|---------------------|-------------------|---------------------|-------------------|------------------------|-------------------|---------------------|-------------------|----------------------|-------------------|--|
|                        |     | Symptoms and feelings |                   | Daily activities    |                   | Leisure             |                   | Work and school     |                   | Personal relationships |                   | Treatment           |                   | Mean (SD)            | Corr <sup>a</sup> |  |
|                        |     | Mean (SD)             | Corr <sup>a</sup> | Mean (SD)           | Corr <sup>a</sup> | Mean (SD)           | Corr <sup>a</sup> | Mean (SD)           | Corr <sup>a</sup> | Mean (SD)              | Corr <sup>a</sup> | Mean (SD)           | Corr <sup>a</sup> |                      |                   |  |
| Time since diagnosis   | 267 | na                    | 0.05              | na                  | <b>0.13</b>       | na                  | <b>0.17</b>       | na                  | -0.03             | na                     | <b>0.23</b>       | na                  | 0.04              | na                   | <b>0.17</b>       |  |
| vIGA-AD                |     |                       |                   |                     |                   |                     |                   |                     |                   |                        |                   |                     |                   |                      |                   |  |
| 3                      | 147 | <b>3.8</b><br>(1.4)   | na                | <b>2.5</b><br>(1.7) | na                | 2.0<br>(1.9)        | na                | <b>1.1</b><br>(1.1) | na                | 1.2<br>(1.6)           | na                | <b>1.0</b><br>(1.0) | na                | <b>11.5</b><br>(7.2) | na                |  |
| 4                      | 120 | <b>4.3</b><br>(1.3)   | na                | <b>3.1</b><br>(1.7) | na                | 2.3<br>(2.0)        | na                | <b>1.5</b><br>(1.1) | na                | 1.2<br>(1.6)           | na                | <b>1.4</b><br>(1.0) | na                | <b>14.3</b><br>(6.8) | na                |  |
| EASI                   | 267 | na                    | <b>0.20</b>       | na                  | <b>0.15</b>       | na                  | <b>0.13</b>       | na                  | <b>0.23</b>       | na                     | 0.06              | na                  | <b>0.21</b>       | na                   | <b>0.19</b>       |  |
| SCORAD                 | 266 | na                    | <b>0.41</b>       | na                  | <b>0.36</b>       | na                  | <b>0.26</b>       | na                  | <b>0.36</b>       | na                     | <b>0.16</b>       | na                  | <b>0.29</b>       | na                   | <b>0.36</b>       |  |
| % BSA affected         | 267 | na                    | 0.09              | na                  | 0.03              | na                  | 0.03              | na                  | <b>0.13</b>       | na                     | -0.11             | na                  | 0.08              | na                   | 0.02              |  |
| Biological product     |     |                       |                   |                     |                   |                     |                   |                     |                   |                        |                   |                     |                   |                      |                   |  |
| Yes                    | 37  | 4.4<br>(1.3)          | na                | 3.1<br>(1.8)        | na                | 2.5<br>(2.0)        | na                | 1.5<br>(1.1)        | na                | 1.4<br>(1.6)           | na                | 1.4<br>(1.0)        | na                | 14.5<br>(7.4)        | na                |  |
| No                     | 230 | 4.0<br>(1.4)          | na                | 2.7<br>(1.7)        | na                | 2.1<br>(1.9)        | na                | 1.3<br>(1.1)        | na                | 1.1<br>(1.6)           | na                | 1.2<br>(1.0)        | na                | 12.5<br>(7.1)        | na                |  |
| Asthma                 |     |                       |                   |                     |                   |                     |                   |                     |                   |                        |                   |                     |                   |                      |                   |  |
| Yes                    | 68  | 4.1<br>(1.4)          | na                | <b>3.2</b><br>(1.8) | na                | <b>2.6</b><br>(1.9) | na                | 1.4<br>(1.1)        | na                | <b>1.5</b><br>(1.8)    | na                | 1.3<br>(1.0)        | na                | <b>14.5</b><br>(7.3) | na                |  |
| No                     | 199 | 4.0<br>(1.4)          | na                | <b>2.6</b><br>(1.7) | na                | <b>1.9</b><br>(1.9) | na                | 1.3<br>(1.1)        | na                | <b>1.1</b><br>(1.5)    | na                | 1.2<br>(1.0)        | na                | <b>12.1</b><br>(7.1) | na                |  |
| Allergic rhinitis      |     |                       |                   |                     |                   |                     |                   |                     |                   |                        |                   |                     |                   |                      |                   |  |
| Yes                    | 23  | 4.1<br>(1.3)          | na                | 3.0<br>(1.6)        | na                | 2.0<br>(1.8)        | na                | 1.7<br>(1.3)        | na                | 1.2<br>(1.3)           | na                | 1.3<br>(1.0)        | na                | 13.7<br>(6.7)        | na                |  |
| No                     | 244 | 4.0<br>(1.4)          | na                | 2.7<br>(1.8)        | na                | 2.1<br>(1.9)        | na                | 1.2<br>(1.1)        | na                | 1.2<br>(1.6)           | na                | 1.2<br>(1.0)        | na                | 12.7<br>(7.2)        | na                |  |

Spearman's rank coefficients are reported for correlations between continuous/ordinal demographic/clinical variables and DLQI scores. Mean DLQI scores for categorical variables were compared using Mann-Whitney tests (two categories) or ANOVA F-test (multiple categories); significant results (p<0.05) shown in **bold**.

<sup>a</sup>Interpretation of Spearman's rank correlation coefficient (for ordinal and continuous variables): 0.90–1.00, very high positive; 0.70–0.90, high positive; 0.50–0.70, moderate positive; 0.30–0.50, low positive; 0.00–0.30, negligible [36].

BSA, body surface area; corr, correlation; DLQI, Dermatology Life Quality Index; EASI, Eczema Area and Severity Index; vIGA-AD, validated Investigator Global Assessment for Atopic Dermatitis; na, not applicable; SCORAD, SCORing Atopic Dermatitis; SD, standard deviation.

**Supplementary Table 4 Variation in DLQI scores by PROs at baseline (n=267)**

| Subject characteristic | n   | Domain scores         |                   |                  |                   |           |                   |                 |                   |                        |                   |           |                   | Total score |                   |
|------------------------|-----|-----------------------|-------------------|------------------|-------------------|-----------|-------------------|-----------------|-------------------|------------------------|-------------------|-----------|-------------------|-------------|-------------------|
|                        |     | Symptoms and feelings |                   | Daily activities |                   | Leisure   |                   | Work and school |                   | Personal relationships |                   | Treatment |                   | Mean (SD)   | Corr <sup>a</sup> |
|                        |     | Mean (SD)             | Corr <sup>a</sup> | Mean (SD)        | Corr <sup>a</sup> | Mean (SD) | Corr <sup>a</sup> | Mean (SD)       | Corr <sup>a</sup> | Mean (SD)              | Corr <sup>a</sup> | Mean (SD) | Corr <sup>a</sup> |             |                   |
| Worst Pruritus NRS     | 267 | na                    | <b>0.60</b>       | na               | <b>0.44</b>       | na        | <b>0.37</b>       | na              | <b>0.32</b>       | na                     | <b>0.25</b>       | na        | <b>0.26</b>       | na          | <b>0.46</b>       |
| Sleep Disturbance NRS  | 267 | na                    | <b>0.52</b>       | na               | <b>0.51</b>       | na        | <b>0.47</b>       | na              | <b>0.45</b>       | na                     | <b>0.42</b>       | na        | <b>0.37</b>       | na          | <b>0.59</b>       |

Spearman's rank coefficients are reported for correlations between continuous/ordinal demographic/clinical variables and DLQI scores. Mean DLQI scores for categorical variables were compared using Mann–Whitney tests (two categories) or ANOVA F-test (multiple categories); significant results (p<0.05) shown in **bold**.

<sup>a</sup>Interpretation of Spearman's rank correlation coefficient (for ordinal and continuous variables): 0.90–1.00, very high positive; 0.70–0.90, high positive; 0.50–0.70, moderate positive; 0.30–0.50, low positive; 0.00–0.30, negligible [36].

Corr, correlation; DLQI, Dermatology Life Quality Index; na, not applicable; NRS, Numerical Rating Scale; PRO, patient-reported outcome; SD, standard deviation.

# Supplementary Figure 1 Change from baseline in DLQI domain scores (n=267)

## (a) Symptoms and feelings

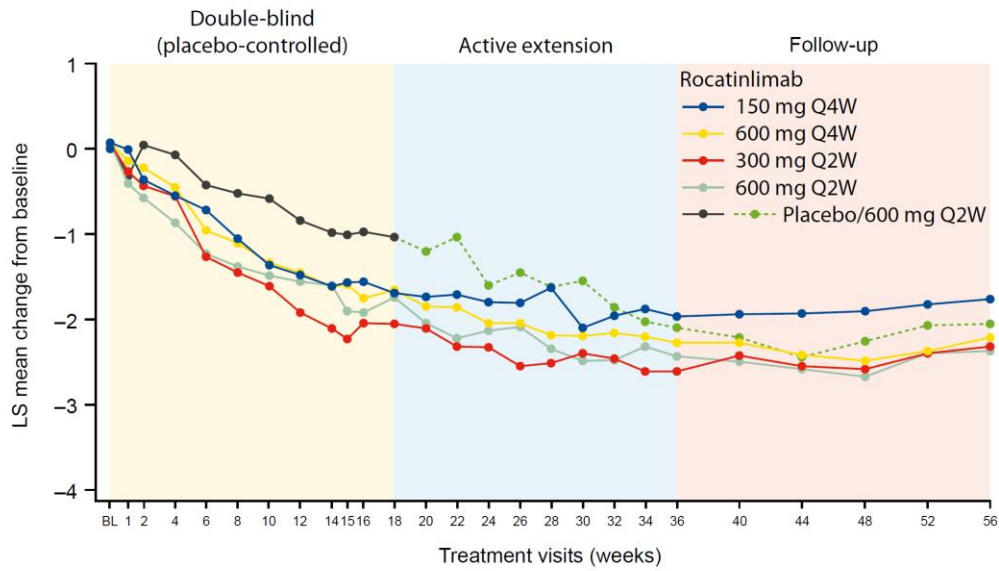

## (b) Daily activities

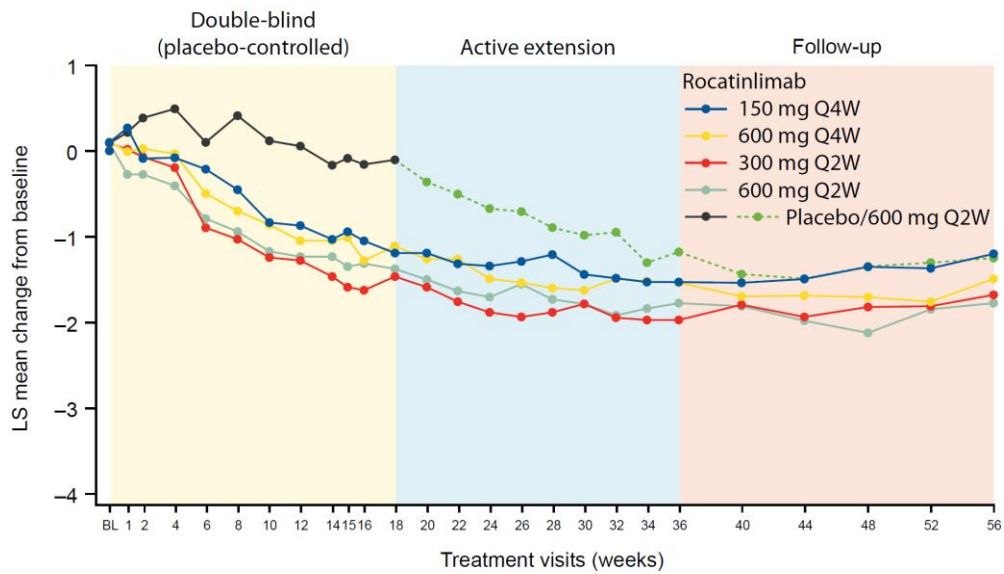



**(c) Leisure**

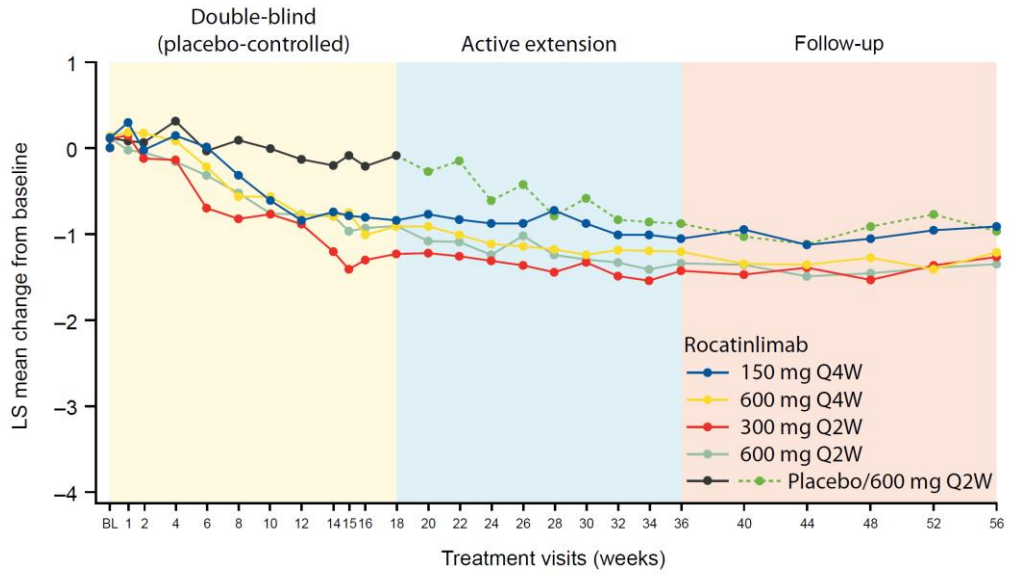

**(d) Work and school**

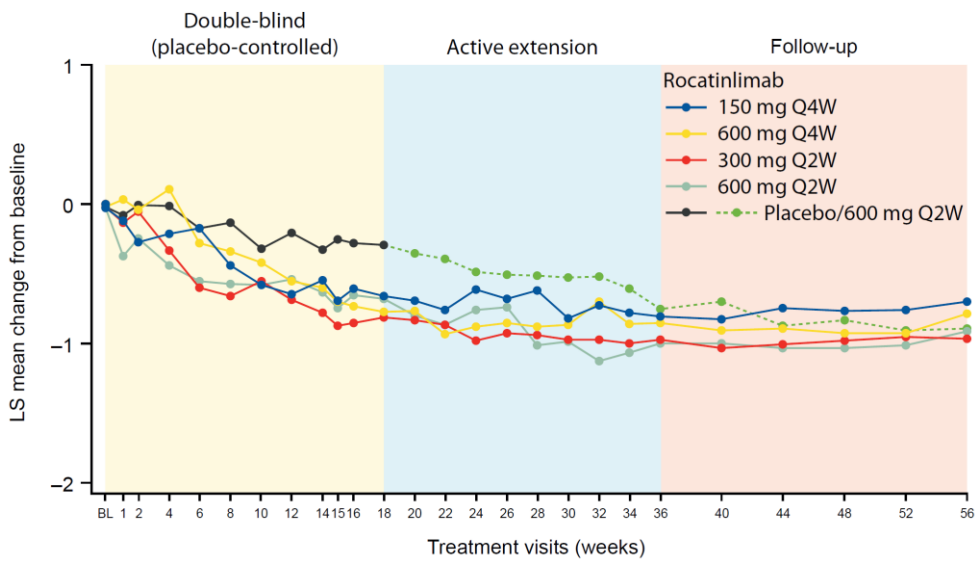

**(e) Personal relationships**

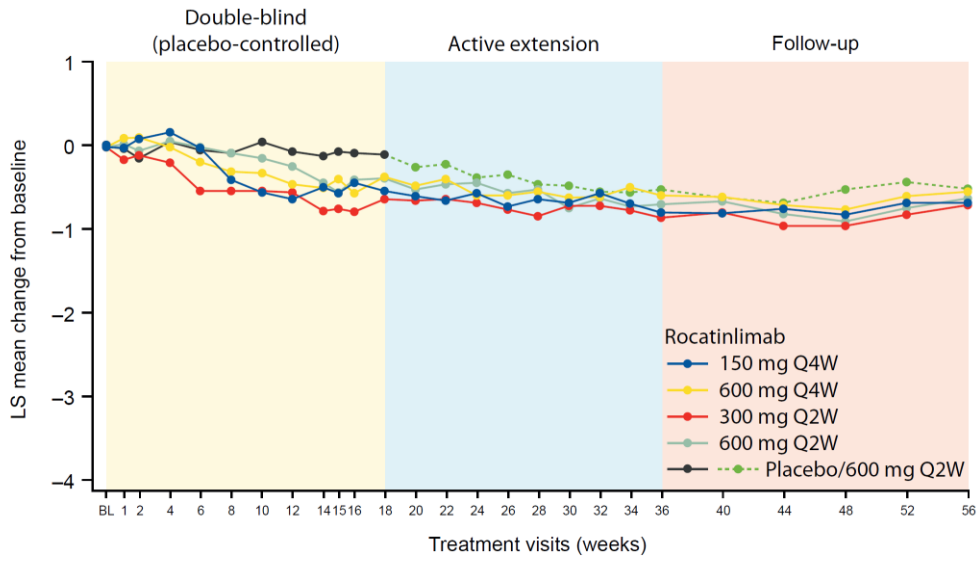

**(f) Treatment**

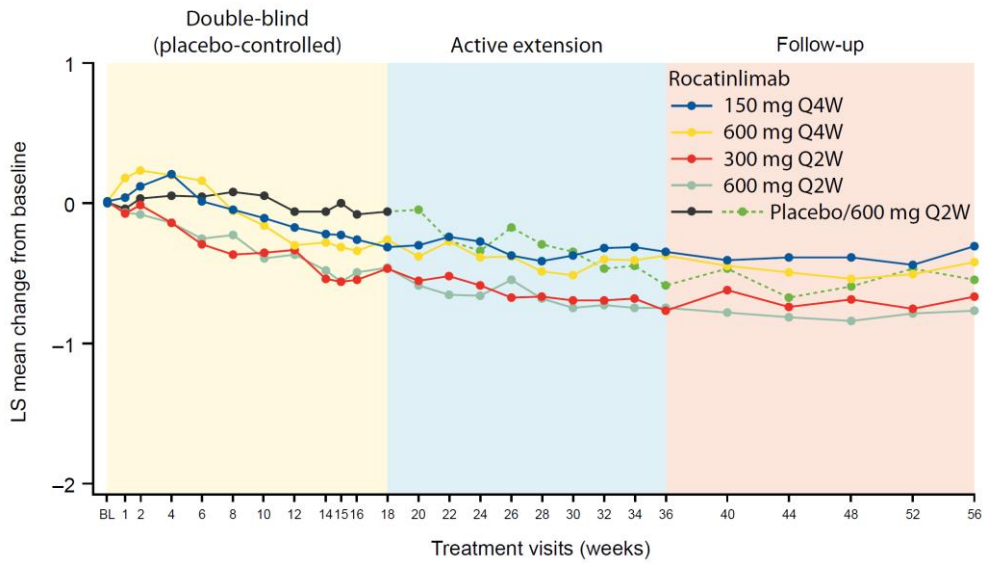

DLQI domain scores 0–6 for Symptoms and feelings, Daily activities, Leisure, and Personal relationships, 0–3 for Work and school, and Treatment; higher scores indicate greater impairment.

BL, baseline; DLQI, Dermatology Life Quality Index; LS, least squares; Q2W, every 2 weeks; Q4W, every 4 weeks.

**Supplementary Figure 2**

**PRO scores at study baseline (n=267)**

**(a) Worst Pruritus NRS**

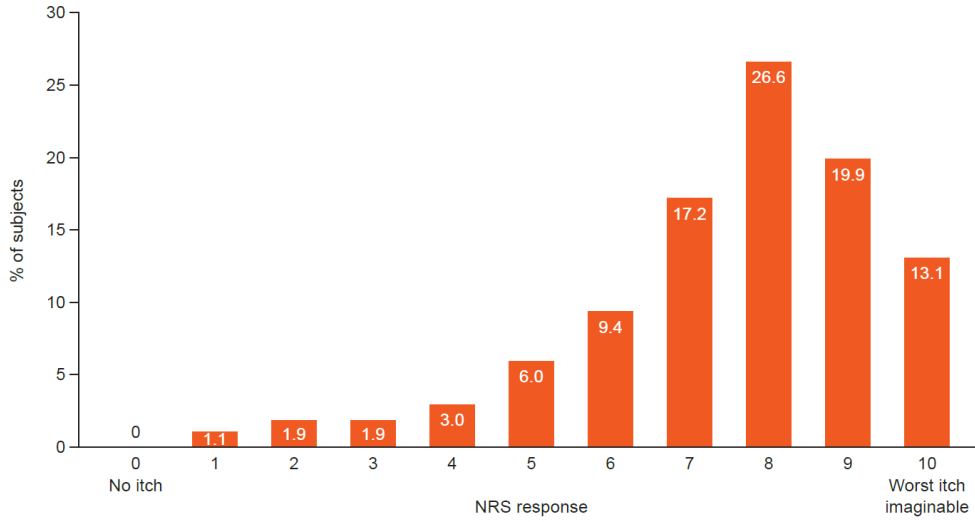

**(b) Sleep Disturbance NRS**

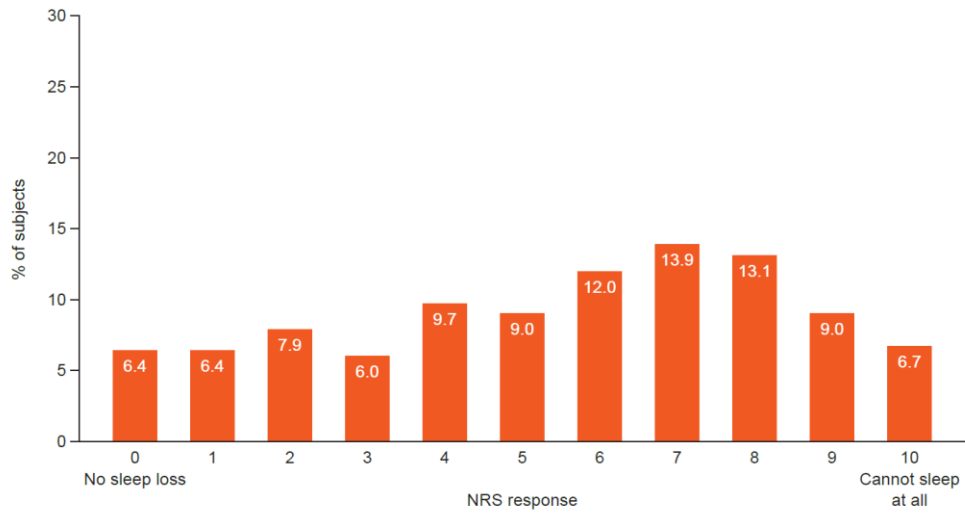

**(b) DLQI domain scores**

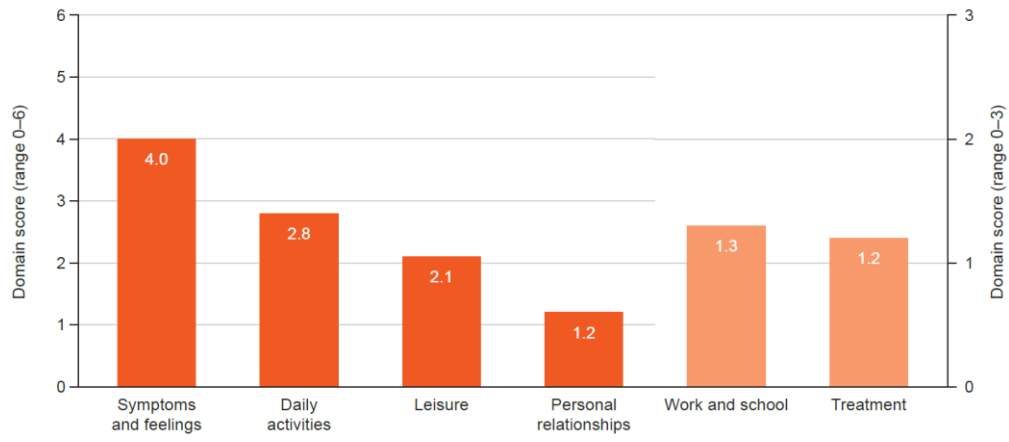

**Supplementary Figure 3**  
**(n=267)**

**Indicators of worse DLQI domain and total scores at baseline**

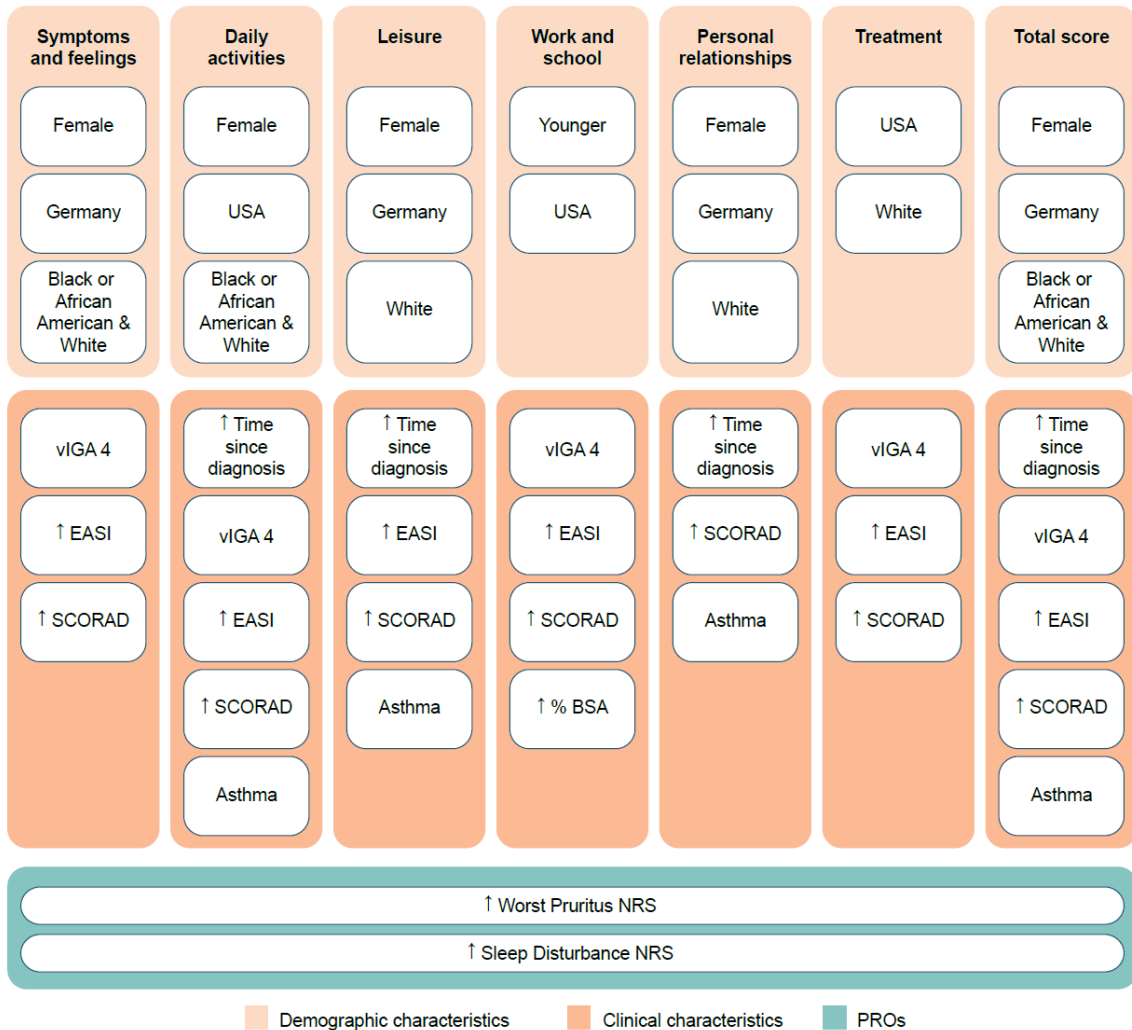

Variation in HRQL by demographic and clinical variables was compared using Spearman’s Rank Correlation Coefficient for continuous/ordinal variables, Mann–Whitney (two categories), and ANOVA F-test (more than two categories). P values <0.05 were considered statistically significant.

Categories: female/male; Canada/Germany/Japan/USA, Asian/Black or African American/Asian, vIGA 3/4.

Higher DLQI scores indicate greater HRQL impairment.

↑, higher; BSA, body surface area; DLQI, Dermatology Life Quality Index; EASI, Eczema Area and Severity Index; NRS, Numerical Rating Scale; PRO, patient-reported outcome; SCORAD, SCORing Atopic Dermatitis; vIGA, validated Investigator Global Assessment for Atopic Dermatitis.
